# Supplementary material
Source: PubMed Central journal article supplement (PMC3443509)

**A**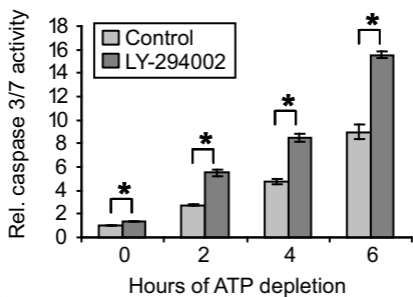**B**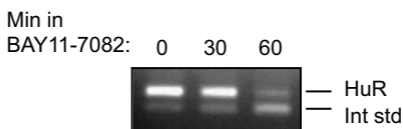**C**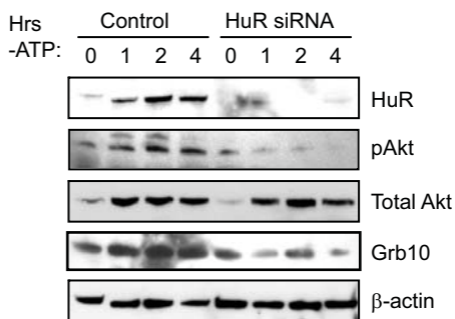**D**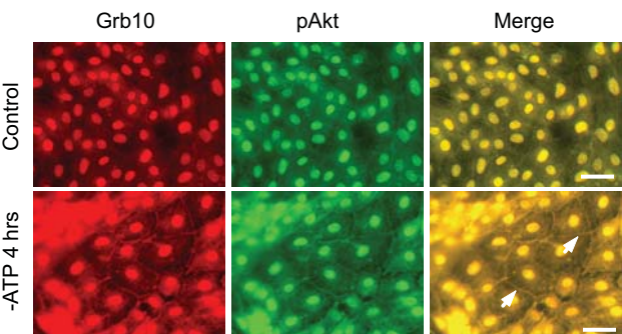

**A**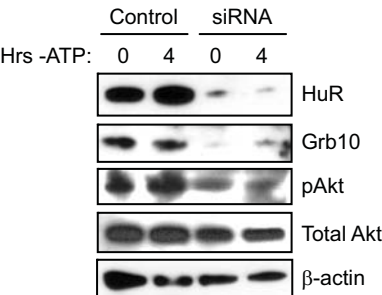**B**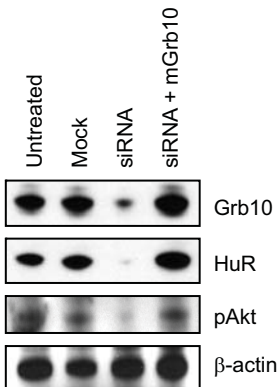

Supplement: NIHMS380868-supplement-Supp_Fig_S1-S2.pdf [file NIHMS380868-supplement-Supp_Fig_S1-S2.pdf]
